# Supplementary material for: A prospective study of the demographics, management and outcome of patients with acute kidney injury in Cape Town, South Africa
Source: PubMed Central journal article supplement (PMC5453519; doi:10.1371/journal.pone.0177460), 2017-06-01
Supplement: pone.0177460.s001.pdf [file pone.0177460.s001.pdf]

## S1 Table – renal biopsy results (total = 36 patients)

| PATIENT | RENAL BIOPSY RESULT                                                                                 |
|---------|-----------------------------------------------------------------------------------------------------|
| 1       | Acute tubular necrosis, granulomas – Ziehl-Neelsen stain positive                                   |
| 2       | HIV associated nephropathy, granulomas                                                              |
| 3       | Ascending pyelonephritis                                                                            |
| 4       | Crescents, mesangiocapillary (membranoproliferative) glomerulonephritis                             |
| 5       | Acute tubular necrosis, granulomas                                                                  |
| 6       | Lupus nephritis class V, necrotising lesions, crescents                                             |
| 7       | Acute post infectious glomerulonephritis                                                            |
| 8       | Necrotising lesions, granulomas                                                                     |
| 9       | Acute tubular necrosis, interstitial HIV associated nephropathy                                     |
| 10      | Mesangiocapillary glomerulonephritis, acute tubular necrosis, granulomas                            |
| 11      | HIV associated nephropathy, acute interstitial nephritis                                            |
| 12      | Mesangiocapillary glomerulonephritis, acute tubular necrosis                                        |
| 13      | Mesangiocapillary glomerulonephritis, crescents                                                     |
| 14      | Mesangiocapillary glomerulonephritis, crescents, lupus nephritis class IV                           |
| 15      | Mesangiocapillary glomerulonephritis, crescents, ? lupus nephritis class IV, acute tubular necrosis |
| 16      | Mesangiocapillary glomerulonephritis, ? lupus nephritis class IV                                    |
| 17      | Acute tubular necrosis                                                                              |
| 18      | Necrotising lesions, IgA                                                                            |
| 19      | Acute post streptococcal glomerulonephritis/post infectious glomerulonephritis                      |
| 20      | Acute mesangiocapillary glomerulonephritis, crescents, acute interstitial nephritis                 |
| 21      | Acute post streptococcal glomerulonephritis/post infectious glomerulonephritis                      |
| 22      | Eosinophils, granulomas                                                                             |
| 23      | HIV associated nephropathy                                                                          |
| 24      | Acute tubular necrosis, HIV associated nephropathy                                                  |
| 25      | Granulomas, acute tubular necrosis, interstitial fibrosis                                           |
| 26      | Hypertension with crenation, ? acute tubular necrosis, interstitial fibrosis                        |
| 27      | Acute tubular necrosis – exclude light chain deposition disease                                     |
| 28      | Acute post streptococcal glomerulonephritis                                                         |
| 29      | HIV associated nephropathy, malignant hypertension, ascending pyelonephritis                        |
| 30      | Malignant hypertension, ascending pyelonephritis, interstitial fibrosis                             |
| 31      | Membranous glomerulonephritis, HIV associated nephropathy – foetal variant, hypertension            |
| 32      | Malignant hypertension                                                                              |
| 33      | Mesangiocapillary glomerulonephritis, crescents, lupus nephritis class IV                           |
| 34      | Acute post infectious glomerulonephritis, crescents                                                 |
| 35      | Mesangiocapillary glomerulonephritis                                                                |
| 36      | HIV associated nephropathy, granulomas, ascending pyelonephritis                                    |
